# Supplementary material
Source: HighWire-hosted journal article supplement (https://jitc.bmj.com/content/10/1/e002927)
Supplement: inline-supplementary-material-8 [file inline-supplementary-material-8.pdf]

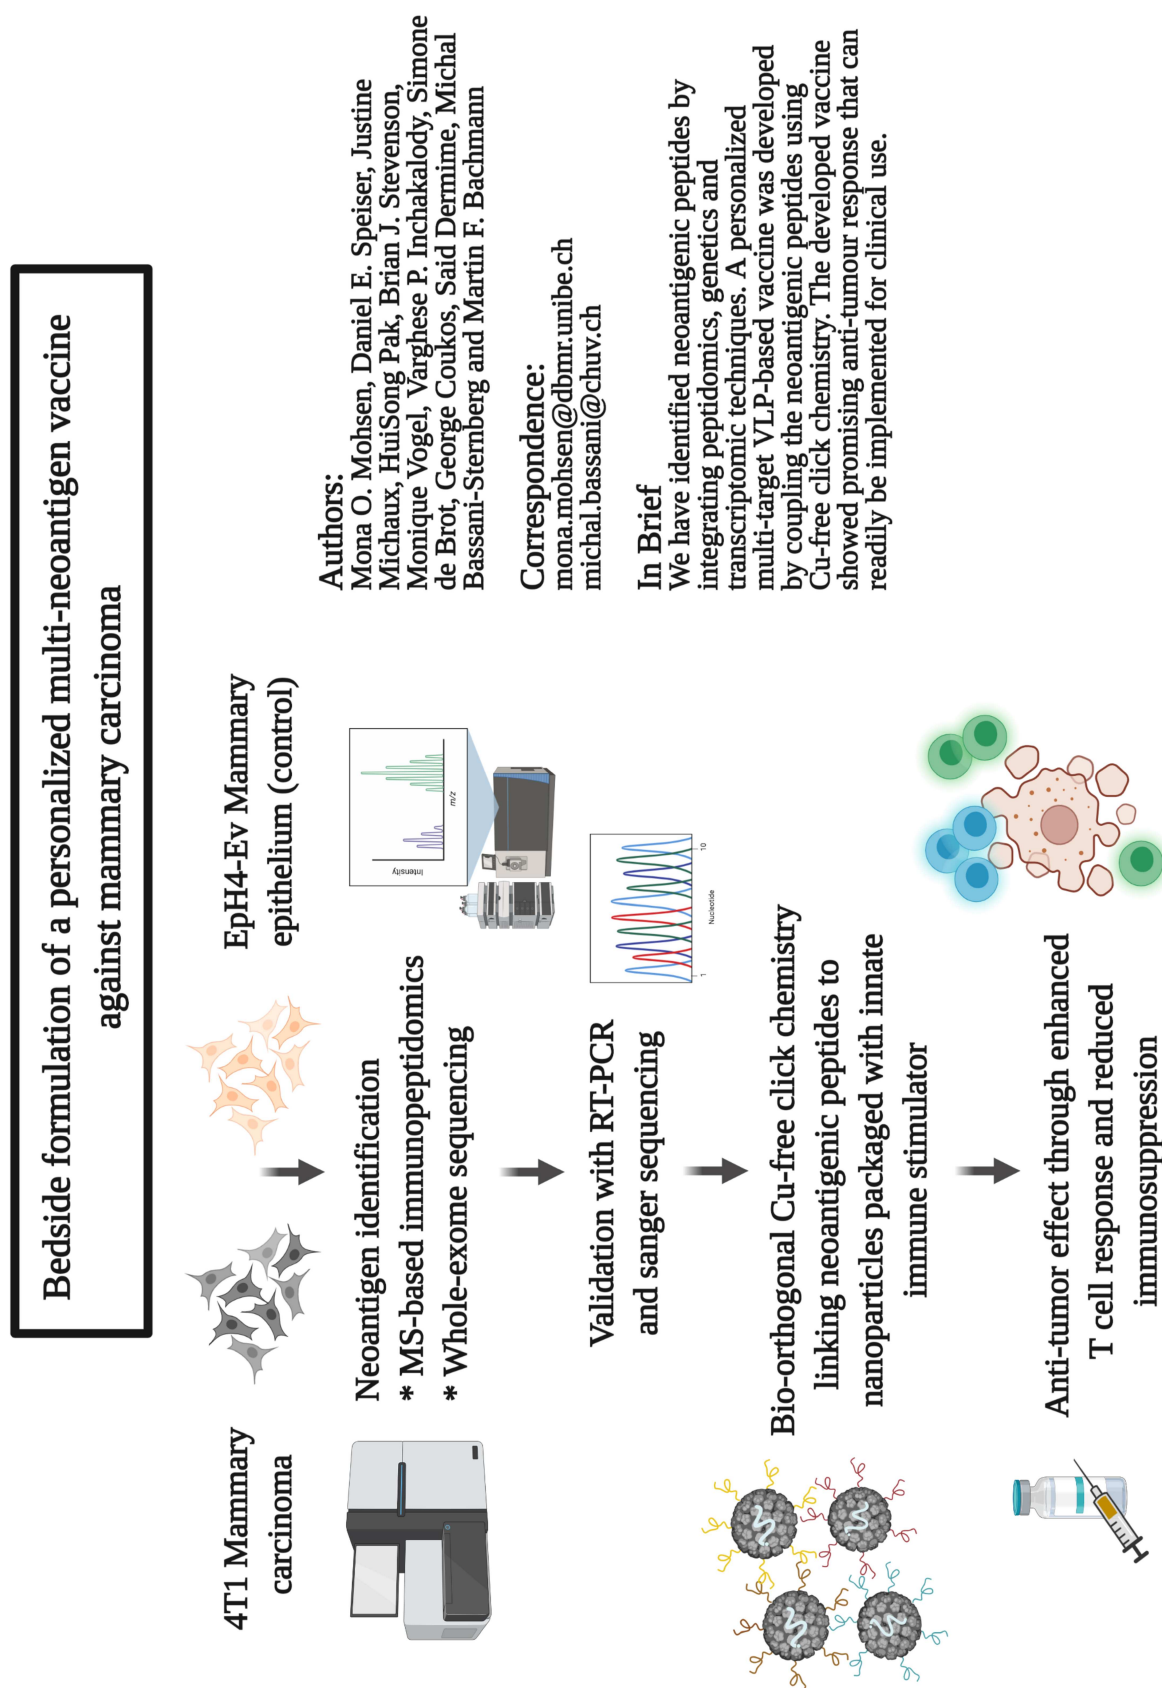

### Authors:

Mona O. Mohsen, Daniel E. Speiser, Justine Michaux, HuiSong Pak, Brian J. Stevenson, Monique Vogel, Varghese P. Inchakalody, Simone de Brot, George Coukos, Said Dermime, Michal Bassani-Sternberg and Martin F. Bachmann

### Correspondence:

mona.mohsen@dbmr.unibe.ch  
 michal.bassani@chuv.ch

### In Brief

We have identified neoantigenic peptides by integrating peptidomics, genetics and transcriptomic techniques. A personalized multi-target VLP-based vaccine was developed by coupling the neoantigenic peptides using Cu-free click chemistry. The developed vaccine showed promising anti-tumour response that can readily be implemented for clinical use.
